# Supplementary material
Source: PubMed Central journal article supplement (PMC4883103)
Supplement: NIHMS787122-supplement-SI.pdf [file NIHMS787122-supplement-SI.pdf]

## Cannabinoid Ester Constituents from High Potency *Cannabis Sativa*

Safwat A. Ahmed, Samir A. Ross,\* Desmond Slade, Mohamed M. Radwan, Fazila Zulfiqar, and  
Mahmoud A. ElSohly

*National Center for Natural Products Research, Department of Pharmacognosy, and Department of  
Pharmaceutics, Research Institute of Pharmaceutical Sciences, School of Pharmacy, The University of  
Mississippi, University, Mississippi 38677, USA*

\* To whom correspondence should be addressed. Tel: +1-662-915-1031. Fax: +1-662-915-1006. E-mail:  
sross@olemiss.edu.

| <b><u>Contents</u></b> |                                                                                    | <b><u>Page</u></b> |
|------------------------|------------------------------------------------------------------------------------|--------------------|
| <b>Figure S1</b>       | HRESIMS (positive mode) of <b>1</b>                                                | S2                 |
| <b>Figure S2</b>       | GCMS of <b>1</b>                                                                   | S3                 |
| <b>Figure S3</b>       | GCMS trimethylsilyl derivatization of <b>1</b>                                     | S4                 |
| <b>Figure S4</b>       | <sup>1</sup> H-NMR: Δ <sup>9</sup> -THCA v <b>1</b> (400 MHz, CDCl <sub>3</sub> )  | S5                 |
| <b>Figure S5</b>       | <sup>13</sup> C-NMR: Δ <sup>9</sup> -THCA v <b>1</b> (400 MHz, CDCl <sub>3</sub> ) | S6                 |
| <b>Figure S6</b>       | DEPT 135 of <b>1</b> (100 MHz, CDCl <sub>3</sub> )                                 | S7                 |
| <b>Figure S7</b>       | HMQC of <b>1</b> (400 MHz, CDCl <sub>3</sub> )                                     | S8                 |
| <b>Figure S8</b>       | HMBC of <b>1</b> (400 MHz, CDCl <sub>3</sub> )                                     | S9                 |
| <b>Figure S9</b>       | HPLC chromatograms of isolated compounds.                                          | S10                |
| <b>Table S1</b>        | GCMS data of isolated compounds.                                                   | S11                |

Figure S1. HRESIMS (positive mode) of **1**

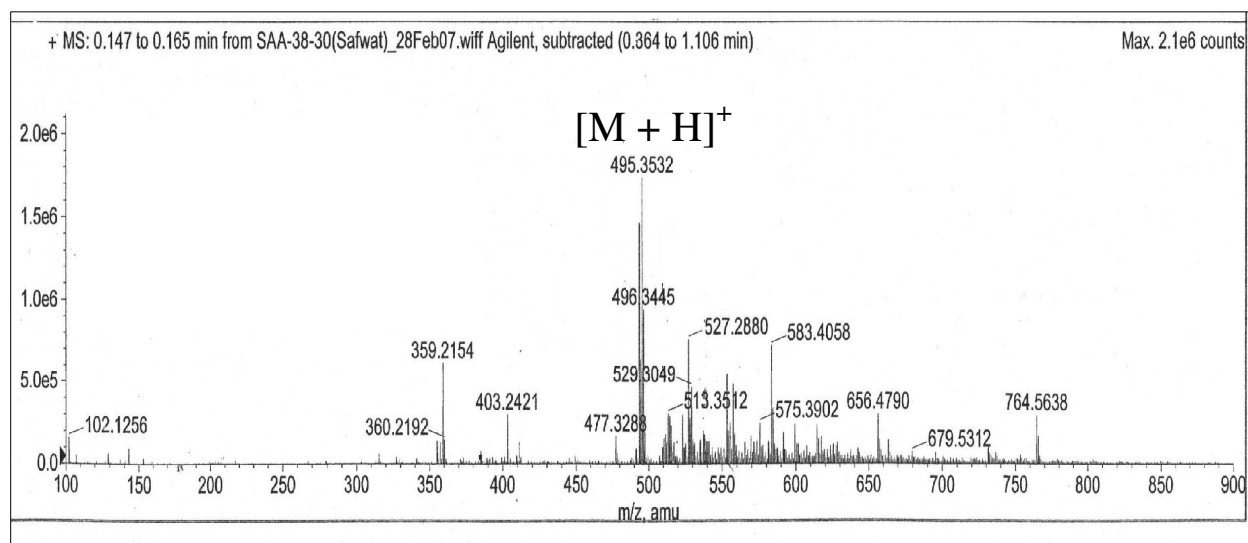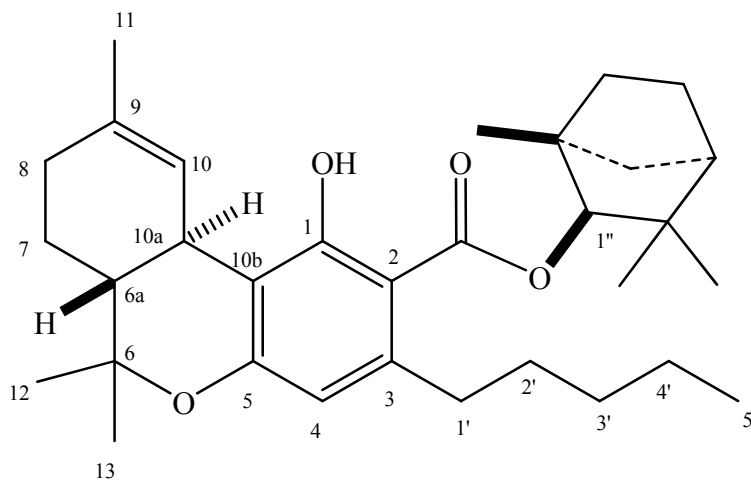

Compound **1**

Figure S2. GCMS of 1

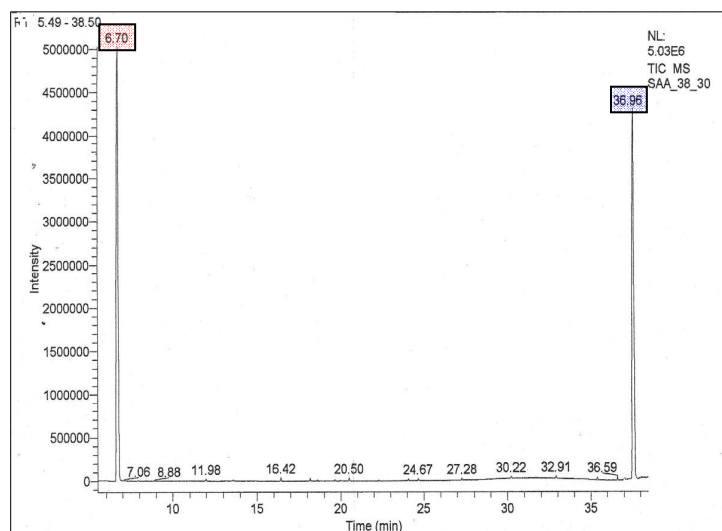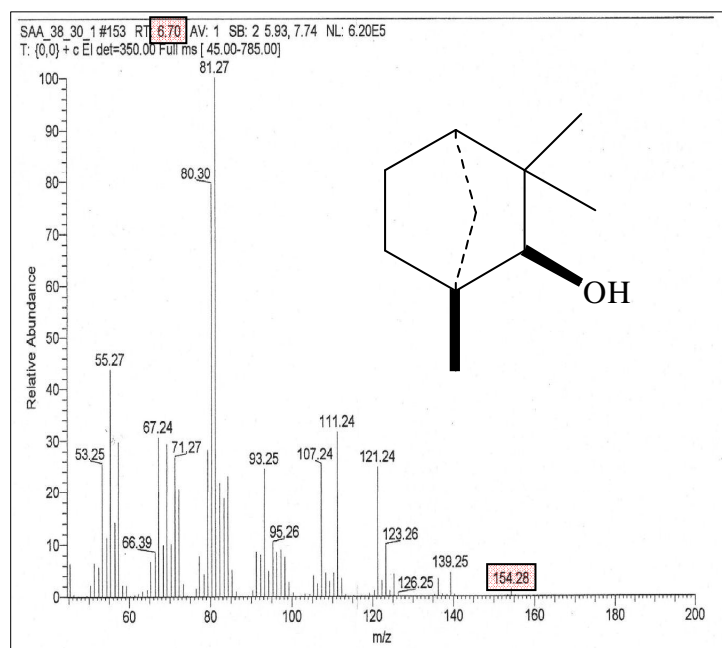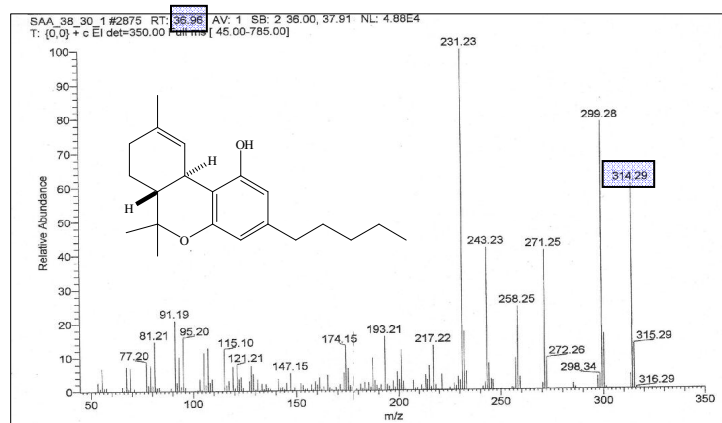

Figure S3. GCMS trimethylsilyl derivatization of 1

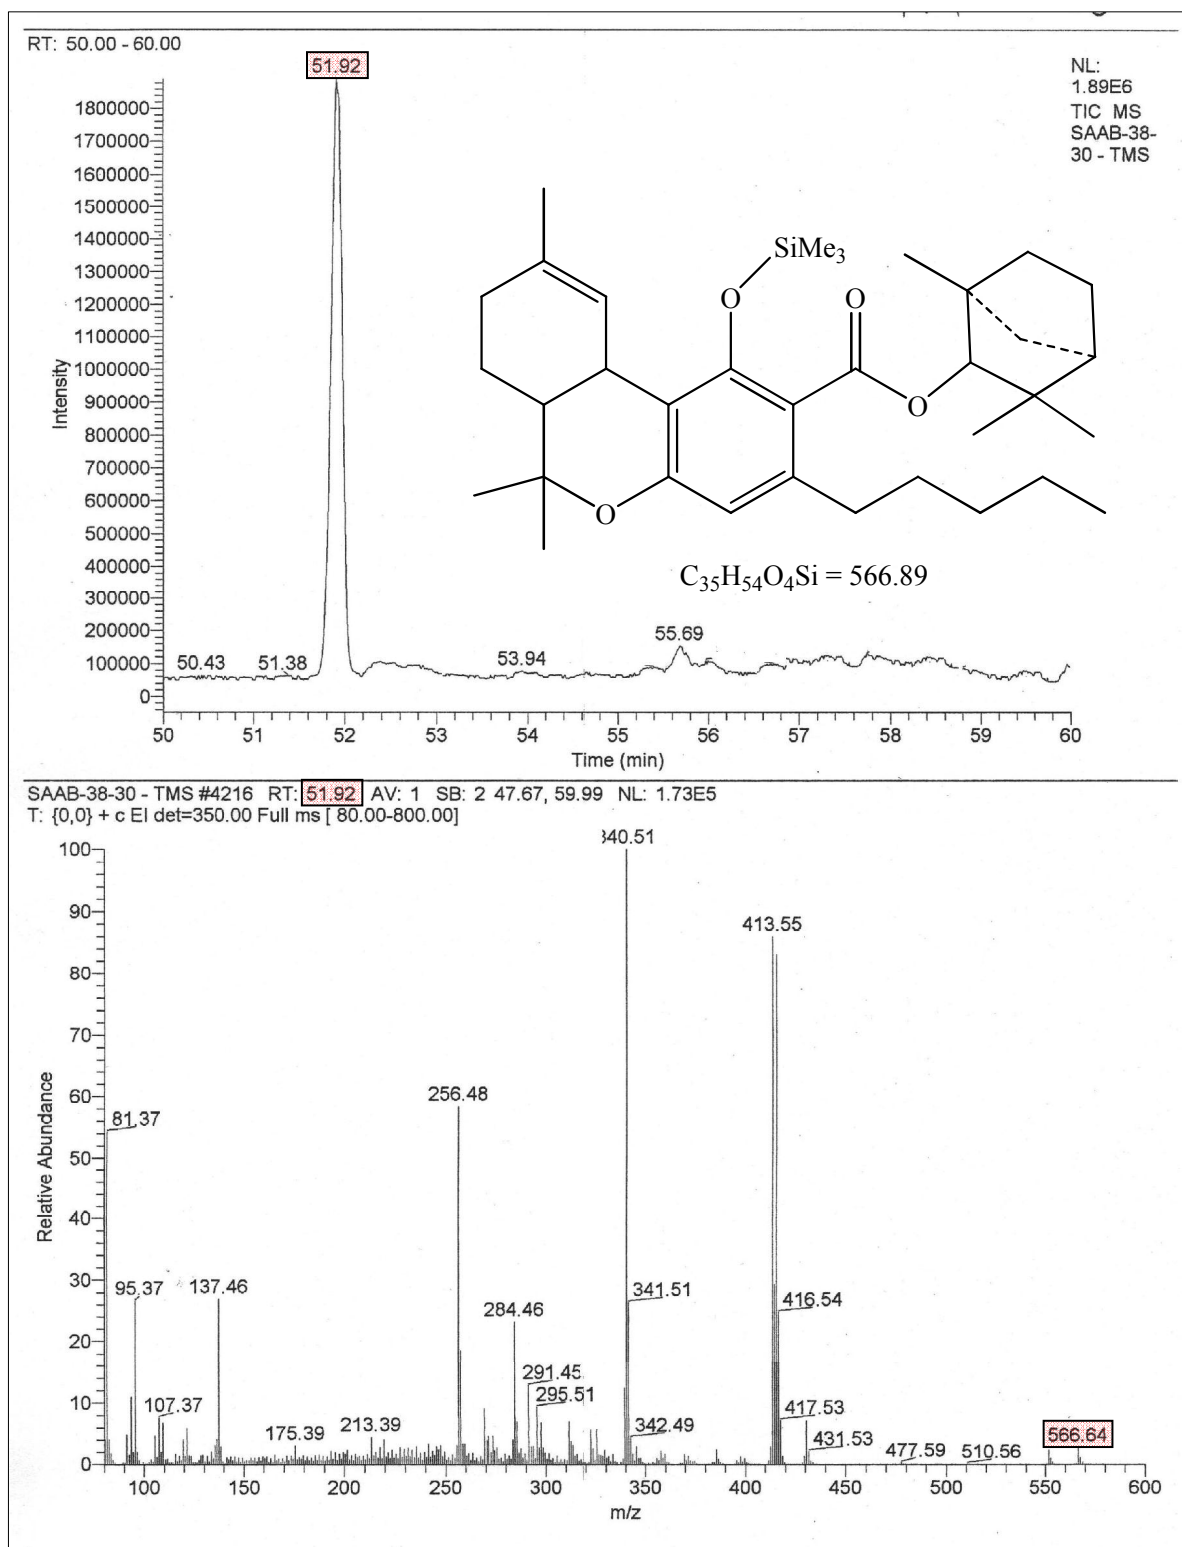

Figure S4.  $^1\text{H-NMR}$ :  $\Delta^9$ -THCA v 1 (400 MHz,  $\text{CDCl}_3$ )

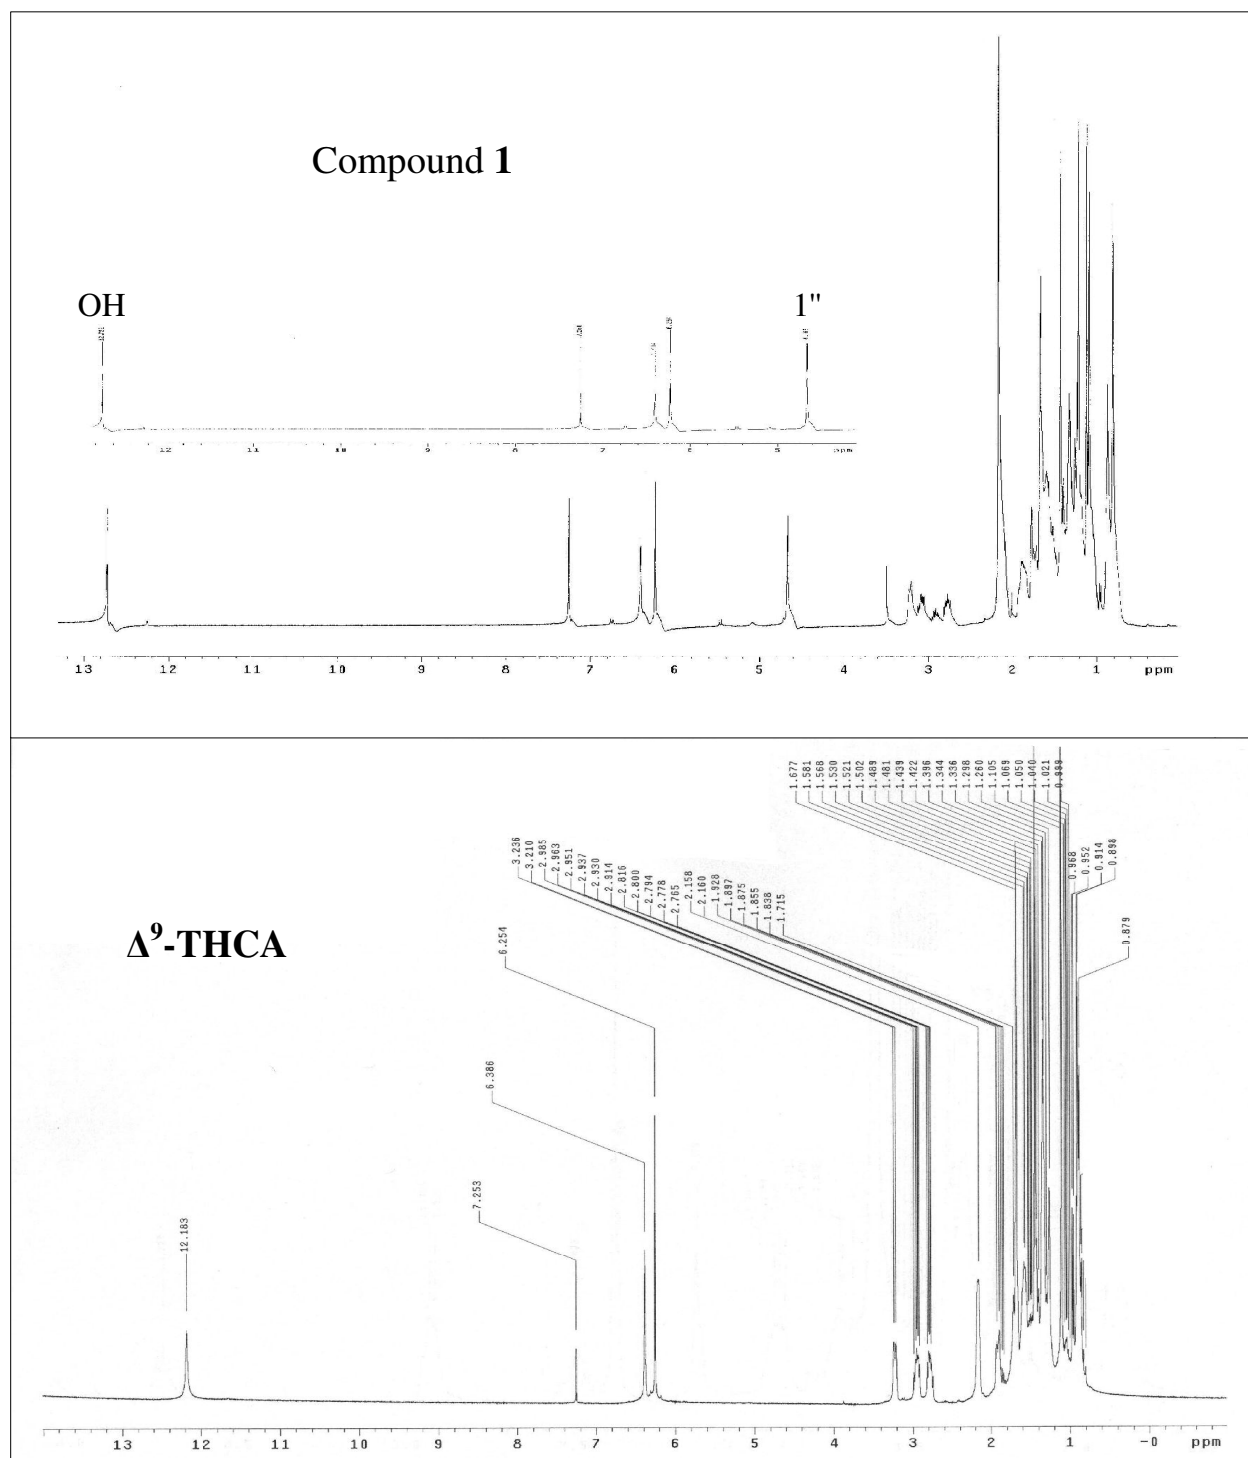

Figure S5.  $^{13}\text{C}$ -NMR:  $\Delta^9$ -THCA v 1 (400 MHz,  $\text{CDCl}_3$ )

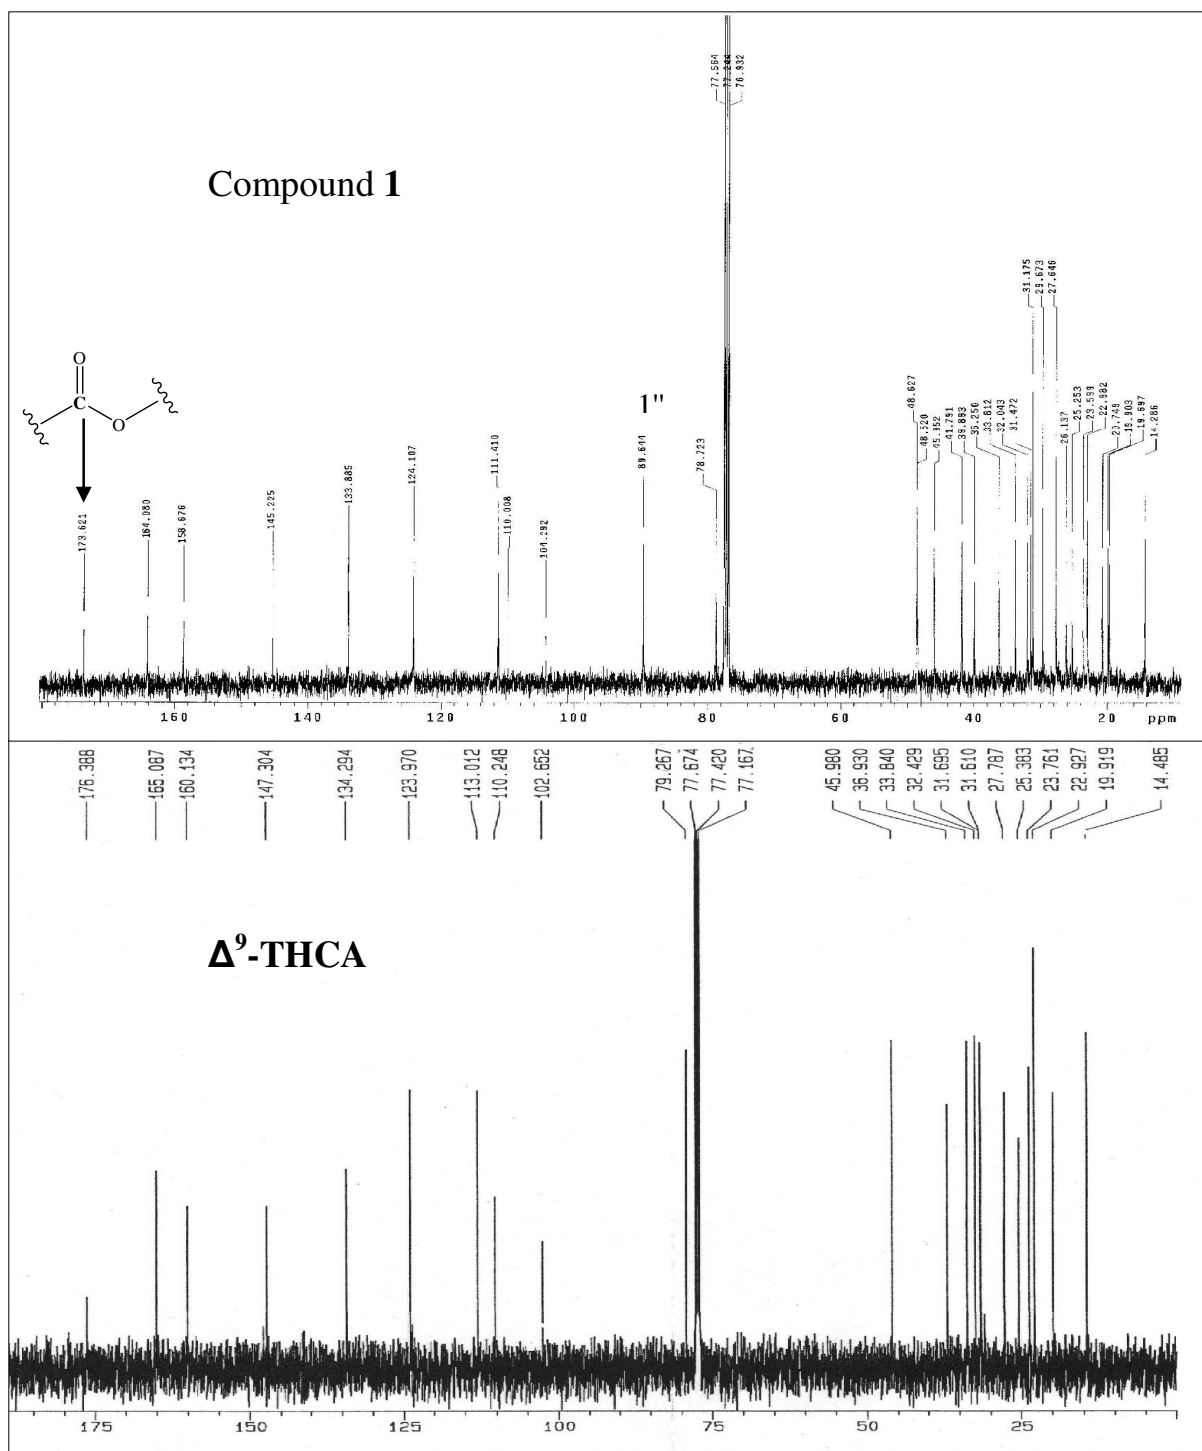

Figure S6. DEPT 135 of **1** (100 MHz, CDCl<sub>3</sub>)

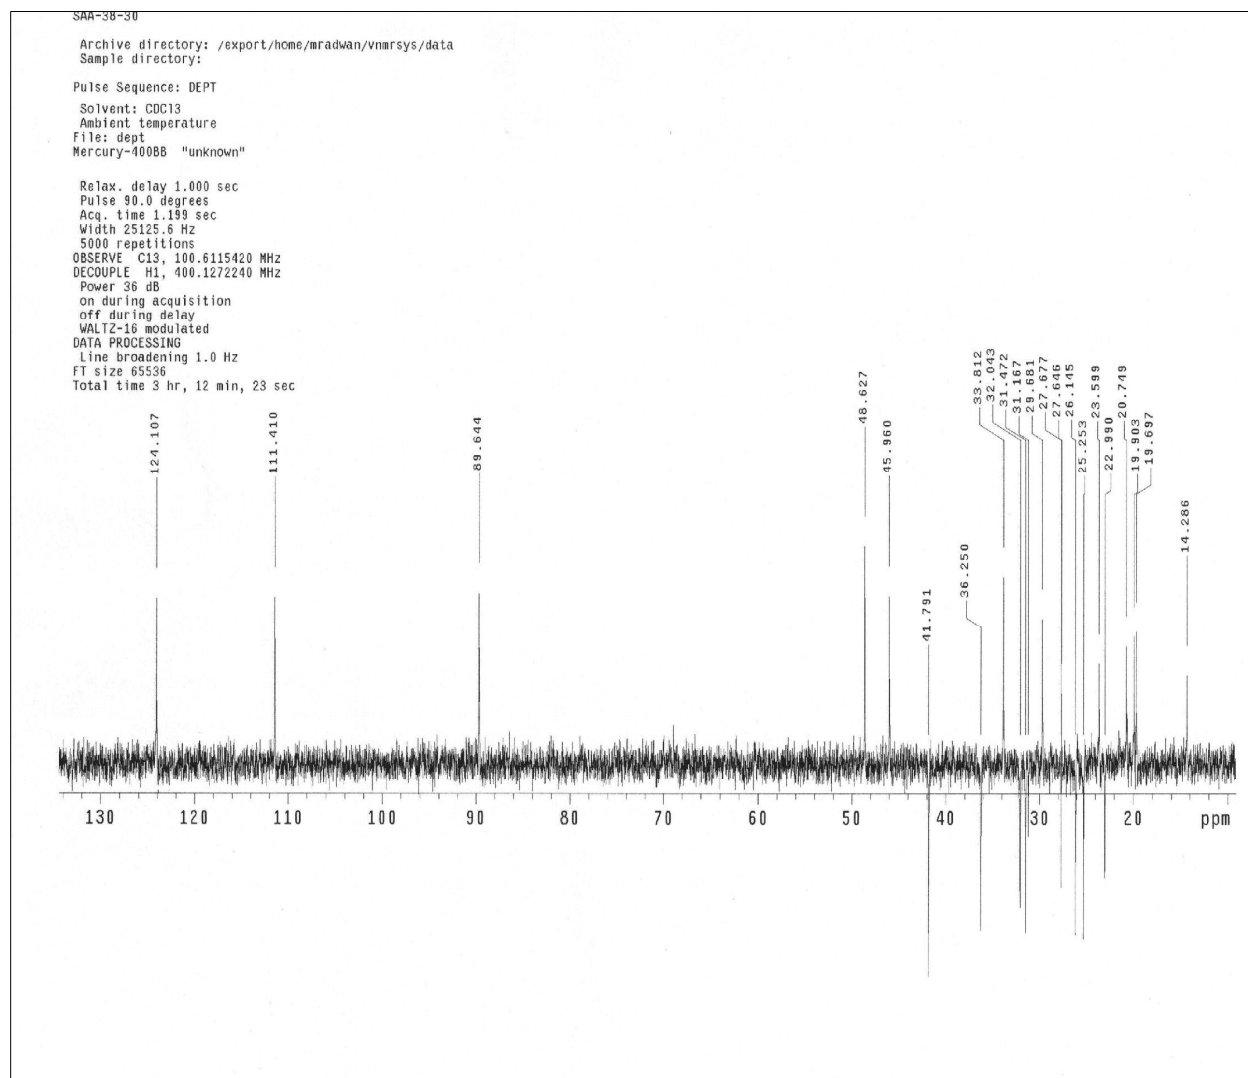

Figure S7. HMQC of **1** (400 MHz, CDCl<sub>3</sub>)

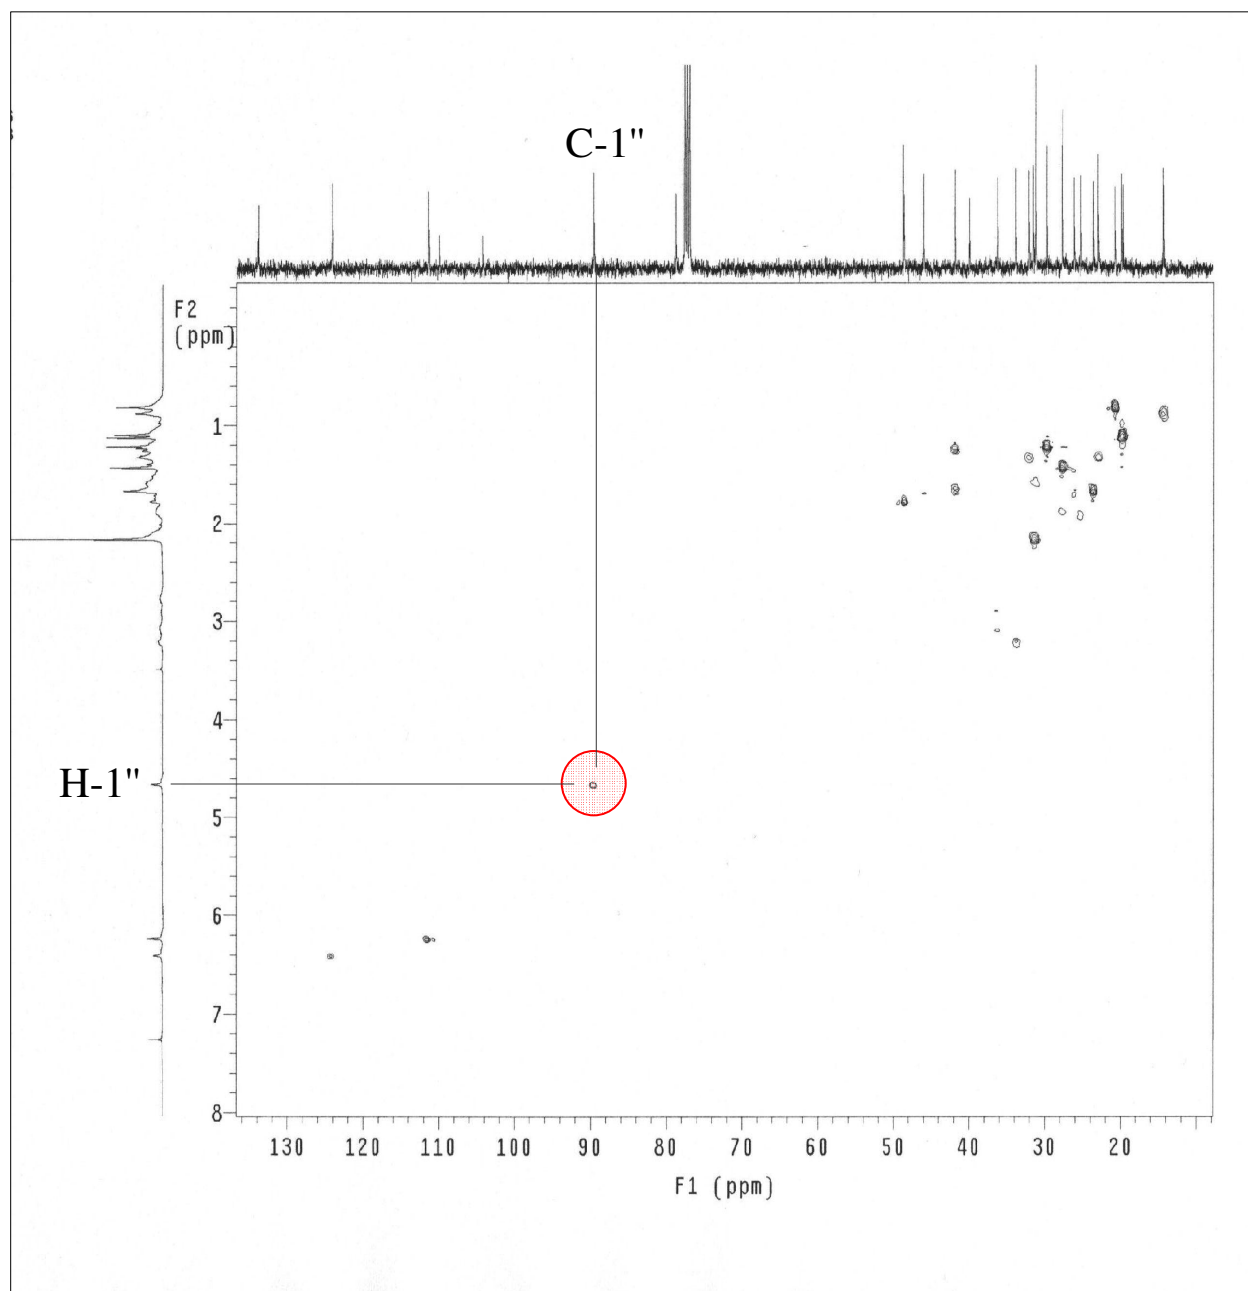



Figure S8. HMBC of **1** (400 MHz, CDCl<sub>3</sub>)

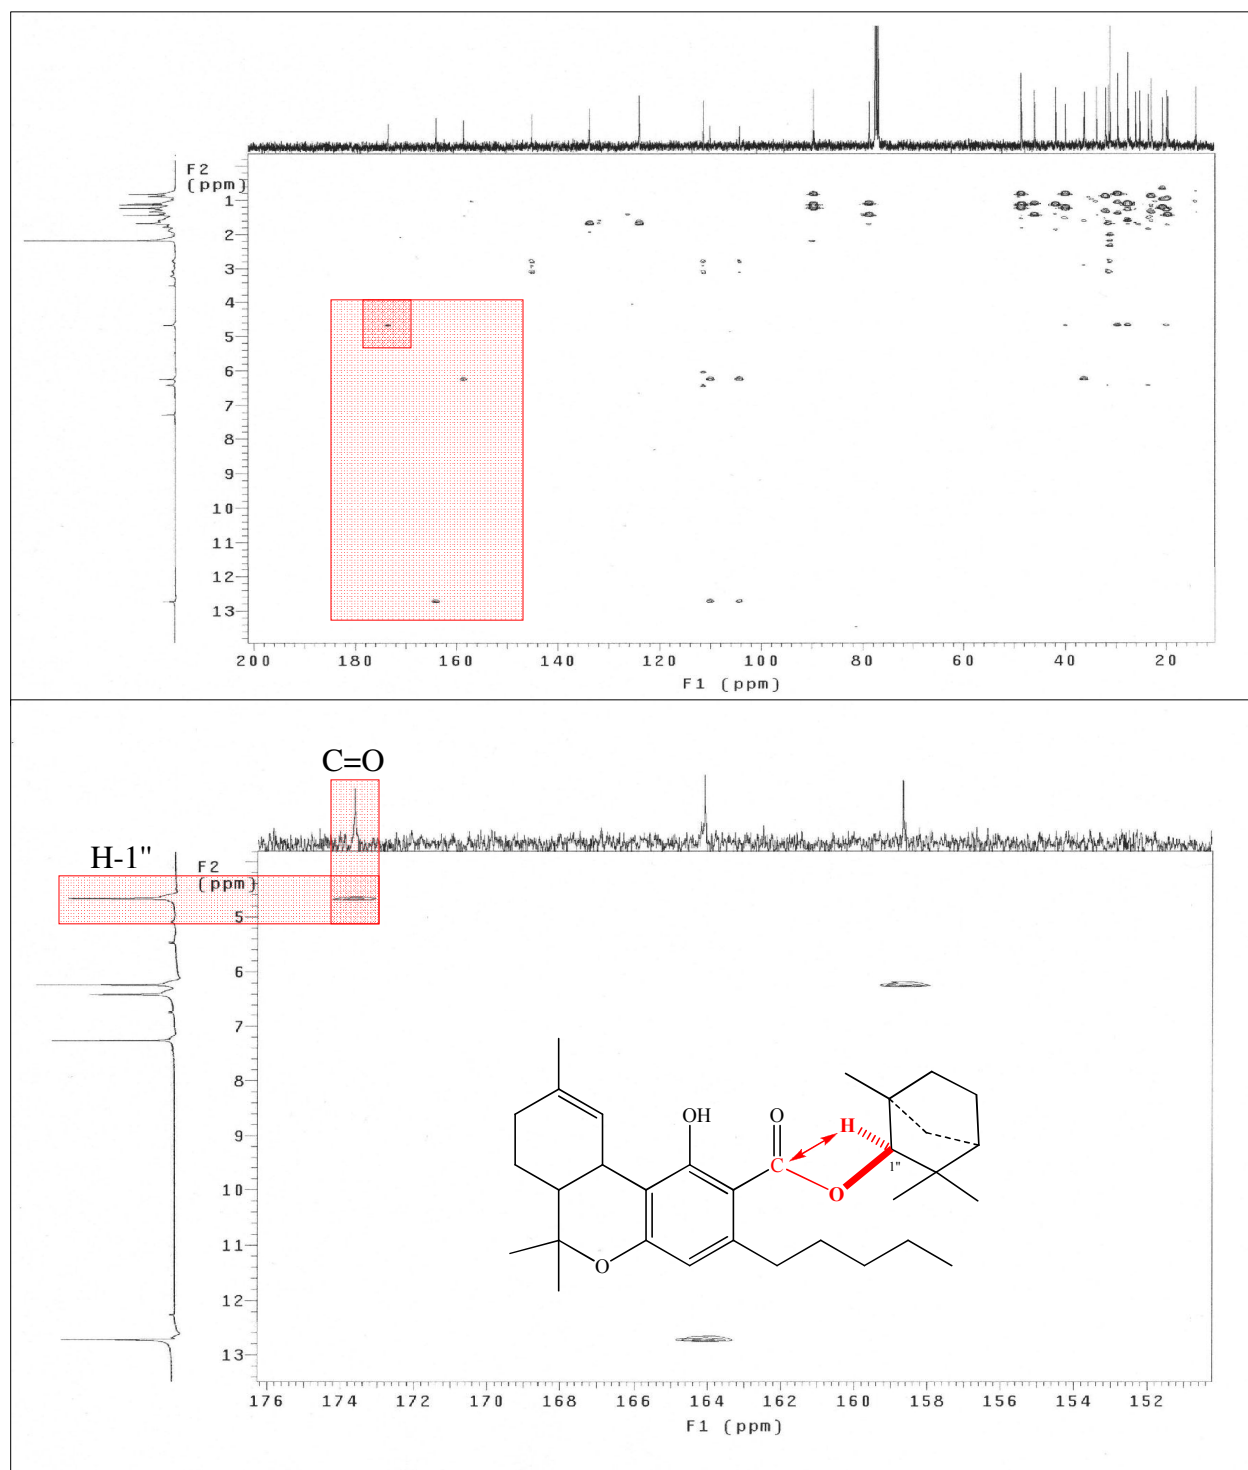

Figure S9. HPLC chromatograms of isolated compounds.

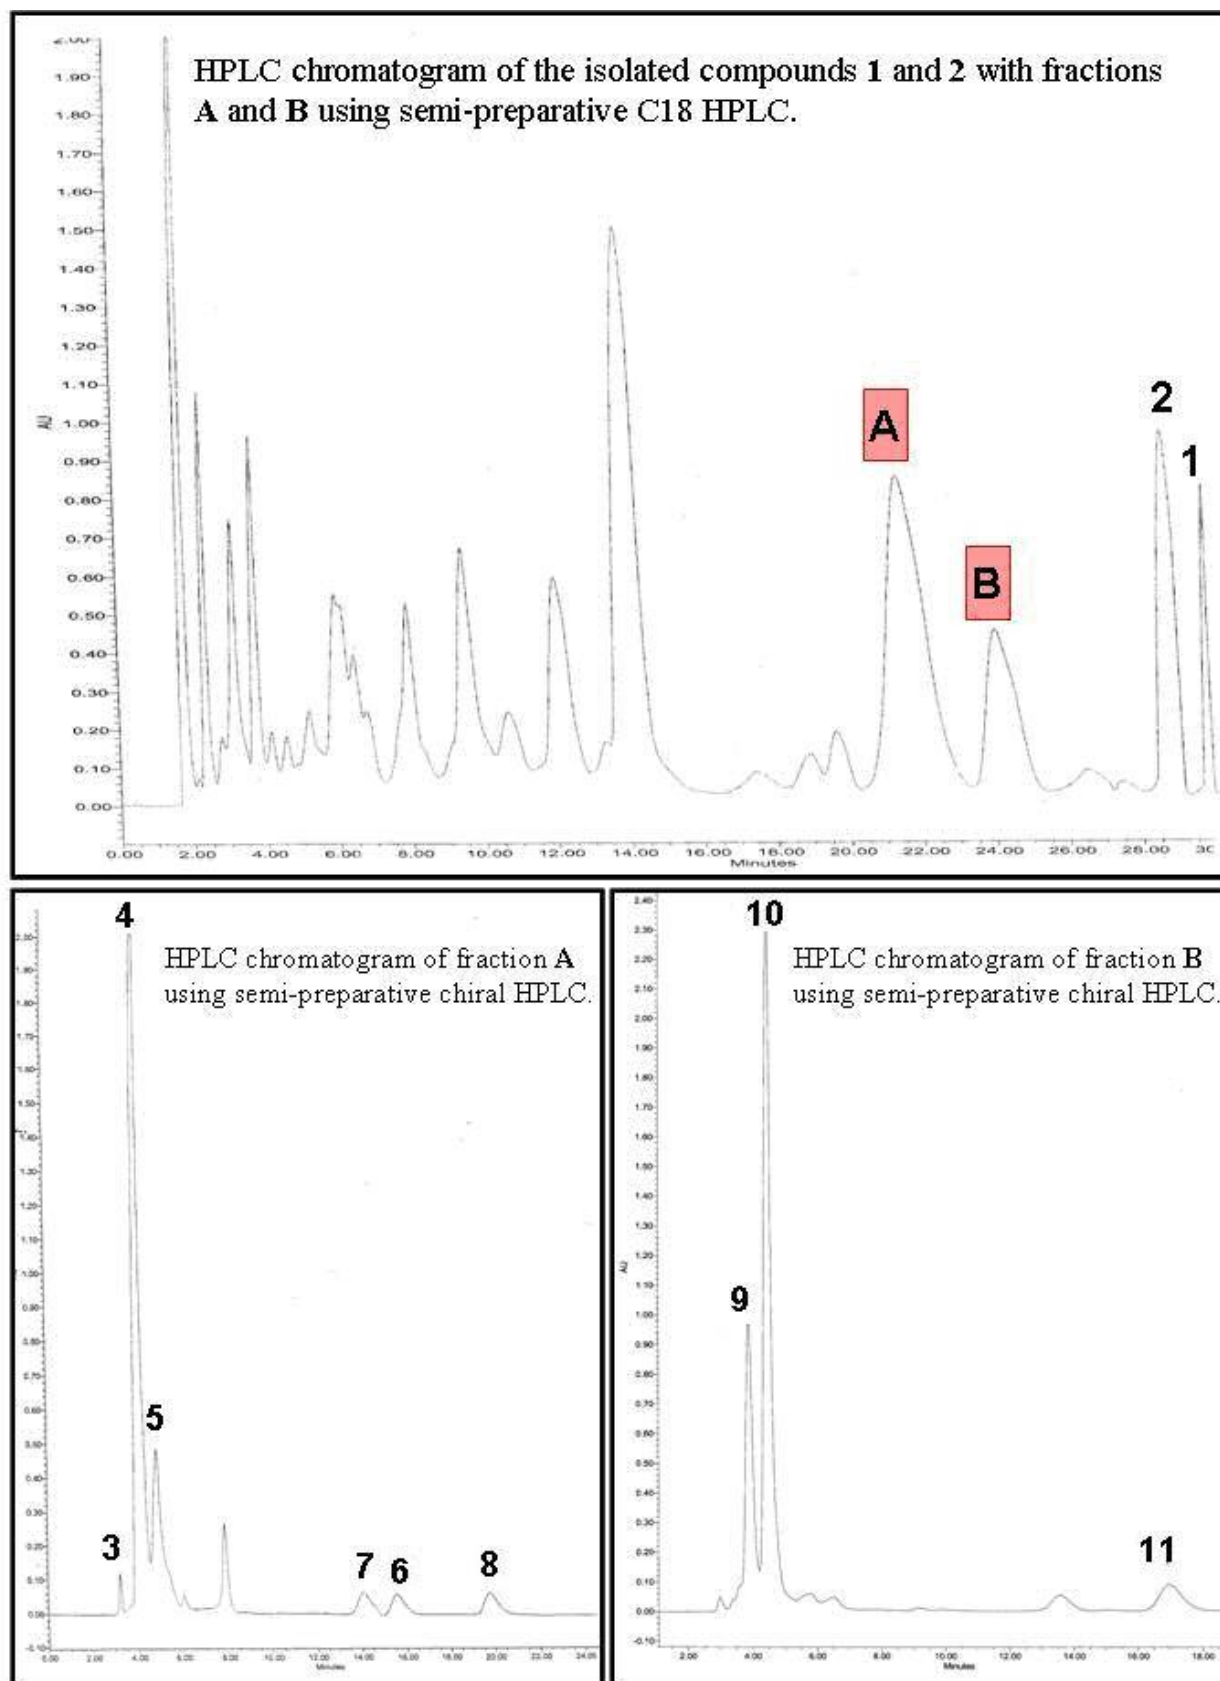

Table S1. GCMS data of isolated compounds.

| <b>Mono- and sesquiterpenol<sup>a</sup></b> | <b><i>t<sub>R</sub></i></b> | <b><i>M</i><sup>+</sup></b> | <b>Base peak</b> | <b>Parent ester</b> |
|---------------------------------------------|-----------------------------|-----------------------------|------------------|---------------------|
| $\alpha$ -fenchol                           | 6.61                        | 154                         | 81               | <b>10</b>           |
| $\beta$ -fenchol                            | 6.70                        | 154                         | 81               | <b>1</b>            |
| borneol                                     | 7.82                        | 154                         | 95               | <b>9</b>            |
| <i>epi</i> -borneol                         | 7.89                        | 154                         | 95               | <b>2</b>            |
| 4-terpineol                                 | 8.08                        | 154                         | 71               | <b>4 and 8</b>      |
| $\alpha$ -terpineol                         | 8.38                        | 154                         | 59               | <b>3</b>            |
| $\alpha$ -cadinol                           | 20.05                       | 222                         | 95               | <b>5 and 11</b>     |
| $\gamma$ -eudesmol                          | 21.02                       | 222                         | 81               | <b>6 and 7</b>      |
| <b><math>\Delta^9</math>-THC</b>            | 36.96                       | 314                         | 231              | -                   |
| <b><math>\Delta^9</math>-THCA</b>           | 36.96 <sup>b</sup>          | 314                         | 231              | -                   |
| <b>CBNA</b>                                 | 37.76 <sup>b</sup>          | 316                         | 193              | -                   |
| <b>CBGA</b>                                 | 37.93 <sup>b</sup>          | 310                         | 295              | -                   |

<sup>a</sup>Components are listed according to their retention times (*t<sub>R</sub>*).

<sup>b</sup>Retention time of decarboxylated cannabinoid acid.
